# Supplementary material
Source: PubMed Central journal article supplement (PMC2861529)
Supplement: hhe0064-0097-s01.pdf [file hhe0064-0097-s01.pdf]

**Supplementary Table 1. Subjects and Phenotyping**

| Collections Used | Entire Sample     |                      |                |                |            |                   |     |     |            | Individuals with DNA |     |     |    |     |                      |                        |
|------------------|-------------------|----------------------|----------------|----------------|------------|-------------------|-----|-----|------------|----------------------|-----|-----|----|-----|----------------------|------------------------|
|                  | Subjects with DNA | Subjects without DNA | Total Subjects | Total Families | Full Trios | Founders with DNA | EA  | AA  | Other Race | M                    | F   | SZ  | SA | UD  | Average Age at Onset | Range of Ages at Onset |
| NIMH-IRP only    | 325               | 117                  | 442            | 67             | 39         | 108               | 88% | 4%  | 7%         | 180                  | 145 | 136 | 24 | 165 | 20.4                 | 6 to 45                |
| NIMH-GI only     | 321               | 39                   | 360            | 69             | 38         | 106               | 55% | 32% | 13%        | 159                  | 162 | 137 | 22 | 162 | 18.5                 | 5 to 38                |
| All Collections  | 646               | 156                  | 802            | 136            | 77         | 214               | 72% | 18% | 10%        | 339                  | 307 | 273 | 46 | 327 | 19.5                 | 5 to 45                |

Note: EA = European ancestry; AA = African American; SZ = schizophrenia; SA = schizoaffective disorder; UD = unknown diagnosis; M = male; F = female. Age at onset refers to overt psychosis onset. NIMH-IRP (Intramural Research Program, also known as the Clinical Neurogenetics – CNG – group) [34,35] and NIMH-GI (Genetics Initiative – Part I) [36] collections have been previously described. The sex distribution was approximately equal (males 52%, females 48%) for subjects with DNA, but more skewed for affected subjects with DNA (males 62%, females 38%).
